# Supplementary material for: Drug-Related Hypersensitivity Reactions Leading to Emergency Department: Original Data and Systematic Review
Source: MDPI journal article supplement (doi:10.3390/jcm11102811), 2022-05-16
Supplement: s1 [file s1]

**Supplementary Table S1.** MedDRA preferred terms attributable to allergic reactions or anaphylaxis.

| pt_code  | pt_name                                          | pt_code  | pt_name                             |
|----------|--------------------------------------------------|----------|-------------------------------------|
| 10068780 | Acetate intolerance                              | 10014197 | Eczema herpeticum                   |
| 10056496 | Acquired hemophilia with anti FVIII, XI, or XIII | 10051890 | Eczema impetiginous                 |
| 10066224 | Acute post asthmatic amyotrophy                  | 10014198 | Eczema infantile                    |
| 10001598 | Alcohol intolerance                              | 10014199 | Eczema infected                     |
| 10052613 | Allergic bronchitis                              | 10014201 | Eczema nummular                     |
| 10059447 | Allergic colitis                                 | 10066042 | Eczema vaccinatum                   |
| 10053779 | Allergic cough                                   | 10058681 | Eczema vesicular                    |
| 10051394 | Allergic cystitis                                | 10055182 | Eczema weeping                      |
| 10060934 | Allergic edema                                   | 10056387 | Encephalitis allergic               |
| 10048594 | Allergic granulomatous angiitis                  | 10014627 | Encephalopathy allergic             |
| 10071198 | Allergic hepatitis                               | 10052363 | Epstein-Barr virus antigen positive |
| 10057380 | Allergic keratitis                               | 10051841 | Exposure to allergen                |
| 10001715 | Allergic myocarditis                             | 10015907 | Eye allergy                         |
| 10061557 | Allergic otitis media                            | 10016248 | Fat intolerance                     |
| 10050639 | Allergic pharyngitis                             | 10016825 | Flushing                            |
| 10063532 | Allergic respiratory disease                     | 10017062 | Formication                         |
| 10063527 | Allergic respiratory symptom                     | 10072104 | Fructose intolerance                |
| 10049153 | Allergic sinusitis                               | 10017605 | Galactose intolerance               |
| 10066173 | Allergic transfusion reaction                    | 10059499 | Hemorrhagic urticaria               |
| 10066536 | Allergy prophylaxis                              | 10073224 | Hepatitis A antigen                 |
| 10053462 | Allergy test                                     | 10063414 | Hepatitis B antigen                 |
| 10056362 | Allergy test negative                            | 10071342 | Hepatitis B core antibody           |
| 10056352 | Allergy test positive                            | 10051160 | Hepatitis B core antigen            |
| 10061626 | Allergy to chemicals                             | 10071343 | Hepatitis B e antibody              |
| 10055048 | Allergy to vaccine                               | 10050914 | Hepatitis B e antigen               |
| 10001890 | Alveolitis allergic                              | 10063051 | Hepatitis B surface antibody        |
| 10063023 | Analgesic asthma syndrome                        | 10050529 | Hepatitis B surface antigen         |
| 10002198 | Anaphylactic reaction                            | 10058437 | Hepatitis D antigen                 |
| 10002199 | Anaphylactic shock                               | 10058451 | Hepatitis D antigen negative        |
| 10067113 | Anaphylactic transfusion reaction                | 10058436 | Hepatitis D antigen positive        |
| 10002216 | Anaphylactoid reaction                           | 10057995 | Hepatitis E antibody normal         |
| 10063119 | Anaphylactoid shock                              | 10060028 | Hepatitis E antigen                 |

|          |                                                          |          |                                       |
|----------|----------------------------------------------------------|----------|---------------------------------------|
| 10067010 | Anaphylactoid syndrome of pregnancy                      | 10060050 | Hepatitis E antigen negative          |
| 10049090 | Anaphylaxis prophylaxis                                  | 10060049 | Hepatitis E antigen positive          |
| 10002222 | Anaphylaxis treatment                                    | 10019878 | Hereditary fructose intolerance       |
| 10002424 | Angioedema                                               | 10063302 | Histamine abnormal                    |
| 10061443 | Antasthmatic drug level                                  | 10068652 | Histamine intolerance                 |
| 10061438 | Antasthmatic drug level above therapeutic                | 10060029 | Histamine level                       |
| 10061439 | Antasthmatic drug level below therapeutic                | 10060052 | Histamine level decreased             |
| 10061442 | Antasthmatic drug level therapeutic                      | 10060051 | Histamine level increased             |
| 10072334 | Anti factor X antibody                                   | 10063303 | Histamine normal                      |
| 10071464 | Anti-actin antibody                                      | 10066928 | Human antichimeric antibody test      |
| 10064059 | Antiallergic therapy                                     | 10066932 | Human anti-human antibody test        |
| 10071466 | Anti-aquaporin-4 antibody                                | 10066929 | Human anti-mouse antibody test        |
| 10071467 | Anti-basal ganglia antibody                              | 10067432 | Human seminal plasma hypersensitivity |
| 10071467 | Anti-basal ganglia antibody                              | 10073257 | Idiopathic angioedema                 |
| 10071477 | Anti-complement antibody                                 | 10021247 | Idiopathic urticaria                  |
| 10076977 | Antindomysial antibody test                              | 10063787 | Implant site urticaria                |
| 10071462 | Anti-epithelial antibody                                 | 10049585 | Infantile asthma                      |
| 10071474 | Anti-exosome complex antibody                            | 10065490 | Infusion site urticaria               |
| 10071473 | Anti-ganglioside antibody                                | 10058032 | Inhibiting antibodies                 |
| 10063038 | Anti-glomerular basement membrane antibody               | 10066221 | Injection site eczema                 |
| 10071470 | Anti-glycyl-tRNA synthetase antibody                     | 10049263 | Injection site joint redness          |
| 10071469 | Anti-IA2 antibody                                        | 10022107 | Injection site urticaria              |
| 10072886 | Anti-interferon antibody                                 | 10052098 | Iodine allergy                        |
| 10050516 | Anti-islet cell antibody                                 | 10023681 | Lactose intolerance                   |
| 10071475 | Anti-muscle specific kinase antibody                     | 10064866 | Laryngitis allergic                   |
| 10071475 | Anti-muscle specific kinase antibody                     | 10052331 | Leukocyte antigen B-27 positive       |
| 10072531 | Antimyocardial antibody                                  | 10048774 | Lymphocytotoxic antibody positive     |
| 10071463 | Anti-neuronal antibody                                   | 10058300 | Lysinuric protein intolerance         |
| 10050552 | Antineutrophil cytoplasmic antibody                      | 10050921 | Malaria antibody test                 |
| 10050894 | Anti-neutrophil cytoplasmic antibody positive vasculitis | 10070880 | Malaria antibody test negative        |
| 10071468 | Anti-NMDA antibody                                       | 10070881 | Malaria antibody test positive        |
| 10064726 | Antinuclear antibody increased                           | 10060066 | Measles antibody                      |
| 10058341 | Antiphospholipid antibodies                              | 10068773 | Mechanical urticaria                  |
| 10072533 | Antiribosomal P antibody                                 | 10071754 | Milk soy protein intolerance          |

|          |                                               |          |                                           |
|----------|-----------------------------------------------|----------|-------------------------------------------|
| 10071465 | Anti-thrombin antibody                        | 10028164 | Multiple allergies                        |
| 10071472 | Anti-transglutaminase antibody                | 10059638 | Mumps antibody test                       |
| 10071476 | Anti-VGCC antibody                            | 10059645 | Mumps antibody test negative              |
| 10071478 | Anti-VGKC antibody                            | 10059644 | Mumps antibody test positive              |
| 10071461 | Anti-vimentin antibody                        | 10029120 | Nephritis allergic                        |
| 10071471 | Anti-zinc transporter 8 antibody              | 10058063 | Neutralizing antibodies                   |
| 10050099 | Application site eczema                       | 10064982 | Non-neutralizing antibodies positive      |
| 10050104 | Application site urticaria                    | 10070836 | Occupational asthma                       |
| 10061430 | Arthritis allergic                            | 10068355 | Oral allergy syndrome                     |
| 10003553 | Asthma                                        | 10063927 | Orthostatic intolerance                   |
| 10003559 | Asthma late onset                             | 10033993 | Parietal cell antibody                    |
| 10066654 | Asthma prophylaxis                            | 10069493 | Perennial allergy                         |
| 10064823 | Asthmatic crisis                              | 10063438 | Pruritus allergic                         |
| 10060972 | Autoantibody test                             | 10038192 | Red man syndrome                          |
| 10005149 | Blepharitis allergic                          | 10039033 | Rhesus antibodies                         |
| 10072187 | Breast milk substitute intolerance            | 10039085 | Rhinitis allergic                         |
| 10006474 | Bronchopulmonary aspergillosis allergic       | 10051126 | Scleritis allergic                        |
| 10071318 | Carbohydrate antigen 125 normal               | 10051401 | Small bowler angioedema                   |
| 10071200 | Carbohydrate intolerance                      | 10041961 | Status asthmaticus                        |
| 10007262 | Carcinoembryonic antigen                      | 10042432 | Sucrose intolerance                       |
| 10007522 | Cardiac asthma                                | 10059212 | Tissue polypeptide antigen                |
| 10052272 | Catheter site urticaria                       | 10072338 | Unilateral bronchospasm                   |
| 10061795 | Cerebrospinal fluid measles antibody positive | 10046735 | Urticaria                                 |
| 10072757 | Chronic spontaneous urticaria                 | 10046739 | Urticaria aquagenic                       |
| 10050737 | Collagen antigen type 1                       | 10046740 | Urticaria cholinergic                     |
| 10063060 | Collagen antigen type IV                      | 10052568 | Urticaria chronic                         |
| 10010744 | Conjunctivitis allergic                       | 10046742 | Urticaria contact                         |
| 10010804 | Contact lens intolerance                      | 10046750 | Urticaria papular                         |
| 10066973 | Contrast media allergy                        | 10046751 | Urticaria physical                        |
| 10012434 | Dermatitis allergic                           | 10046752 | Urticaria pigmentosa                      |
| 10068444 | Device intolerance                            | 10052572 | Urticaria pressure                        |
| 10013661 | Drug allergy                                  | 10046755 | Urticaria vesiculosa                      |
| 10061822 | Drug intolerance                              | 10069622 | Vaccination site urticaria                |
| 10013913 | Dyshidrotic eczema                            | 10066358 | Von Willebrand's factor antibody positive |

|          |                   |          |                                      |
|----------|-------------------|----------|--------------------------------------|
| 10014184 | Eczema            | 10068988 | Von Willebrand's factor antigen test |
| 10014190 | Eczema asteatotic | 10068988 | Von Willebrand's factor antigen test |
| 10014194 | Eczema eyelids    |          |                                      |

**Supplementary Table S2.** Most frequently reported active principles involved in cases of anaphylaxis.

| Drugs                                             | N   | %     |
|---------------------------------------------------|-----|-------|
| Amoxicillin and beta-lactamase inhibitor          | 156 | 25.66 |
| Ceftriaxone                                       | 63  | 10.36 |
| Amoxicillin                                       | 56  | 9.21  |
| Diclofenac                                        | 32  | 5.26  |
| Ketoprofen association                            | 24  | 3.95  |
| Levofloxacin                                      | 20  | 3.29  |
| Iomeprol                                          | 16  | 2.63  |
| Iopromide                                         | 12  | 1.97  |
| Paracetamol                                       | 10  | 1.64  |
| Acetylsalicylic acid                              | 9   | 1.48  |
| Ibuprofen                                         | 8   | 1.32  |
| Ciprofloxacin                                     | 7   | 1.15  |
| Paclitaxel                                        | 7   | 1.15  |
| Thiocolchicoside                                  | 6   | 0.99  |
| Ketorolac                                         | 5   | 0.82  |
| Paracetamol, associations excluding psycholeptics | 5   | 0.82  |
| Lansoprazole                                      | 5   | 0.82  |
| Moxifloxacin                                      | 5   | 0.82  |
| Oxaliplatin                                       | 5   | 0.82  |
| Omeprazole                                        | 4   | 0.66  |
